# Supplementary material for: Natural Surfactant Saponin from Tissue of Litsea glutinosa and Its Alternative Sustainable Production
Source: PubMed Central journal article supplement (PMC7695332; doi:10.3390/plants9111521), 2020-11-09
Supplement: plants-09-01521-s001.pdf [file plants-09-01521-s001.pdf]

**Table S1.** FTIR spectra of functional groups of saponins.

| FTIR Spectrum | Functional Groups                                                  |       | References |
|---------------|--------------------------------------------------------------------|-------|------------|
| 3429-3316     | Hydroxyl group (saponin)                                           | -OH   | [53,54]    |
| 3400          | C-OH stretching (saponin)                                          |       | [42]       |
| 3200-2800     | sp <sup>2</sup> and sp <sup>3</sup> -C-H bond stretching (saponin) |       | [42]       |
| 2929-2920     |                                                                    | C-H   | [53,54]    |
| 2926-2855     | Indicated more CH <sub>2</sub> than CH <sub>3</sub>                |       | [56]       |
| 1740-1736     |                                                                    | C=O   | [54]       |
| 1724-1701     | Carbonyl group                                                     | C=O   | [53]       |
| 1729-1697     |                                                                    | C=O   | [56]       |
| 1730-1700     | C=O (the stretch of the carbonyl bonds)                            |       | [42]       |
| 1619-1651     |                                                                    | C=C   | [54]       |
| 1639          | C=O stretching                                                     |       | [8]        |
| 1637-1632     |                                                                    | C=C   | [56]       |
| 1600          | C=C (saponin)                                                      |       | [42]       |
| 1256-1062     | C-O-C and carboxylic ester groups                                  | C-O-C | [8, 55]    |
| 1034-1074     | Oligosaccharide linkage absorptions to sapogenins                  | C-O-C | [54,55]    |
